# Supplementary material for: Risk and Resilience Variants in the Retinoic Acid Metabolic and Developmental Pathways Associated with Risk of FASD Outcomes
Source: MDPI journal article supplement (doi:10.3390/biom14050569), 2024-05-10
Supplement: s1 [file s1]

**Supplemental Table S4.** Candidate Genes in Neurotransmitter, Forebrain Development and Collagen Genes.

| <b>Gene</b>      | <b>Signaling Pathway Involved</b> |
|------------------|-----------------------------------|
| <i>COL</i> genes | Structural Support Proteins       |
| <i>DBH</i>       | Dopamine                          |
| <i>DRD</i> genes | Dopamine                          |
| <i>HTR</i> genes | Serotonin                         |
| <i>MAO</i>       | Dopamine/Serotonin                |
| <i>OTP</i>       | Forebrain Development             |
| <i>OXT</i>       | Oxytocin Signaling                |
| <i>OXTR</i>      | Oxytocin Receptor                 |
| <i>SIMI</i>      | Forebrain Development             |
| <i>TH</i>        | Dopamine/Serotonin                |
