# Supplementary material for: Risk and Resilience Variants in the Retinoic Acid Metabolic and Developmental Pathways Associated with Risk of FASD Outcomes
Source: MDPI journal article supplement (doi:10.3390/biom14050569), 2024-05-10
Supplement: s1 [file s1]

**Supplemental Table S3.** Candidate Genes in the Causative Genes of Rare Neurodevelopmental Disorders and their Interactive Partners.

| <b>Gene</b>      | <b>Neurodevelopmental Disorder</b>             |
|------------------|------------------------------------------------|
| <i>A2ML1</i>     | Noonan Syndrome gene                           |
| <i>AIFM3</i>     | 22q11.2DS gene                                 |
| <i>ANKRD11</i>   | Cornelia de Lange Syndrome gene                |
| <i>ARVCF</i>     | 22q11.2DS gene                                 |
| <i>B3GLCT</i>    | Peter Plus Syndrome Gene                       |
| <i>BMI-1</i>     | interacts with CHD7                            |
| <i>BRAF</i>      | Noonan Syndrome gene                           |
| <i>BRD4</i>      | Cornelia de Lange Syndrome gene                |
| <i>BRG1</i>      | Cornelia de Lange Syndrome interaction partner |
| <i>CBL genes</i> | Noonan Syndrome gene                           |
| <i>CCDC188</i>   | 22q11.2DS gene                                 |
| <i>CCDC8</i>     | Three M Syndrome 2 Gene                        |
| <i>CDC42</i>     | Aarskog interaction partner                    |
| <i>CDC45</i>     | 22q11.2DS gene                                 |
| <i>CDK8</i>      | Opitz-Kaveggia Syndrome interaction partner    |
| <i>CHD7</i>      | CHARGE Syndrome gene                           |
| <i>CCDC8</i>     | Three M Syndrome 1 gene                        |
| <i>CLDN5</i>     | 22q11.2DS gene                                 |
| <i>CLTCL1</i>    | 22q11.2DS gene                                 |
| <i>COMT</i>      | 22q11.2DS gene                                 |
| <i>CRKL</i>      | 22q11.2DS gene                                 |
| <i>CRMP2</i>     | Aarskog and Noonan Syndromes interaction       |
| <i>CUL7</i>      | Three M Syndrome 2 Gene                        |
| <i>DGCR14</i>    | 22q11.2DS gene                                 |
| <i>DGCR2</i>     | 22q11.2DS gene                                 |
| <i>DGCR6</i>     | 22q11.2DS gene                                 |
| <i>DGCR6L</i>    | 22q11.2DS gene                                 |
| <i>DGCR8</i>     | 22q11.2DS gene                                 |
| <i>DHCR7</i>     | Smith-Lemli-Optiz Syndrome                     |
| <i>DUSP4</i>     | interacts with CHD7                            |
| <i>FGD1</i>      | Aarskog Syndrome gene                          |
| <i>FGFR2</i>     | MAPK/FGF/Apert Syndrome gene                   |
| <i>GNB1L</i>     | 22q11.2DS gene                                 |
| <i>GP1BB</i>     | 22q11.2DS gene                                 |
| <i>GSC2</i>      | 22q11.2DS gene                                 |
| <i>HDAC8</i>     | Cornelia de Lange Syndrome gene                |
| <i>HIC2</i>      | 22q11.2DS gene                                 |
| <i>HIRA</i>      | 22q11.2DS gene                                 |
| <i>KLHL22</i>    | 22q11.2DS gene                                 |

|                     |                                                                   |
|---------------------|-------------------------------------------------------------------|
| <i>KMT2D</i>        | Kabuki Syndrome gene                                              |
| <i>KRAS</i>         | Noonan Syndrome gene                                              |
| <i>LINC00896</i>    | 22q11.2DS gene                                                    |
| <i>LOC101927859</i> | 22q11.2DS gene                                                    |
| <i>LRRC748</i>      | 22q11.2DS gene                                                    |
| <i>LZTR1</i>        | 22q11.2DS gene/Noonan Syndrome gene                               |
| <i>MAU2</i>         | Cornelia de Lange Syndrome interaction                            |
| <i>MED12</i>        | Opitz-Kaveggia Syndrome gene                                      |
| <i>MED13</i>        | Opitz-Kaveggia Syndrome interaction partner                       |
| <i>MED15</i>        | Opitz-Kaveggia Syndrome interaction partner<br>and 22q11.2DS gene |
| <i>MIDI</i>         | Opitz G/BBB Syndrome gene                                         |
| <i>mir1286</i>      | 22q11.2DS gene                                                    |
| <i>mir185</i>       | 22q11.2DS gene                                                    |
| <i>mir3618</i>      | 22q11.2DS gene                                                    |
| <i>mir4761</i>      | 22q11.2DS gene                                                    |
| <i>mir649</i>       | 22q11.2DS gene                                                    |
| <i>mir6816</i>      | 22q11.2DS gene                                                    |
| <i>MRPL40</i>       | 22q11.2DS gene                                                    |
| <i>NIPBL</i>        | Cornelia de Lange Syndrome gene                                   |
| <i>NRAS</i>         | Noonan Syndrome gene                                              |
| <i>OBSL1</i>        | 3M Syndrome type 2 Syndrome gene                                  |
| <i>P2RX6</i>        | 22q11.2DS gene                                                    |
| <i>PARQ3B</i>       | CHARGE Syndrome interaction partner                               |
| <i>PRODH</i>        | 22q11.2DS gene                                                    |
| <i>PTPN11</i>       | Noonan Syndrome gene                                              |
| <i>RAD21</i>        | Cornelia de Lange Syndrome gene                                   |
| <i>RANBP1</i>       | 22q11.2DS and Noonan Syndrome gene                                |
| <i>RECQL3</i>       | Bloom Syndrome gene                                               |
| <i>REST</i>         | Opitz-Kaveggia Syndrome interaction partner                       |
| <i>RIT1</i>         | Noonan Syndrome gene                                              |
| <i>RTN4R</i>        | 22q11.2DS gene                                                    |
| <i>SCARF2</i>       | 22q11.2DS gene                                                    |
| <i>SCRAP</i>        | Floating-Harbour Syndrome gene                                    |
| <i>SEPT5</i>        | 22q11.2DS gene                                                    |
| <i>SERPIND1</i>     | 22q11.2DS gene                                                    |
| <i>SHOC2</i>        | Noonan Syndrome gene                                              |
| <i>SLC25A1</i>      | 22q11.2DS gene                                                    |
| <i>SLC7A4</i>       | 22q11.2DS gene                                                    |
| <i>SMC1A</i>        | Cornelia de Lange Syndrome gene                                   |
| <i>SMC3</i>         | Cornelia de Lange Syndrome gene                                   |
| <i>SNAP29</i>       | 22q11.2DS gene                                                    |
| <i>SOS1</i>         | Noonan Syndrome gene                                              |
| <i>SOS2</i>         | Noonan Syndrome gene                                              |
| <i>SOX9</i>         | Campomelic Dysplasia gene                                         |

|                |                           |
|----------------|---------------------------|
| <i>SPECC1L</i> | Opitz G/BBB Syndrome gene |
| <i>TANGO2</i>  | 22q11.2DS gene            |
| <i>TBX1</i>    | 22q11.2DS gene            |
| <i>THAP7</i>   | 22q11.2DS gene            |
| <i>TRMT2A</i>  | 22q11.2DS gene            |
| <i>TSSK2</i>   | 22q11.2DS gene            |
| <i>TXNRD2</i>  | 22q11.2DS gene            |
| <i>UFD1L</i>   | 22q11.2DS gene            |
| <i>USP41</i>   | 22q11.2DS gene            |
| <i>ZDHHC8</i>  | 22q11.2DS gene            |
| <i>ZNF74</i>   | 22q11.2DS gene            |

---
