# Supplementary material for: Risk and Resilience Variants in the Retinoic Acid Metabolic and Developmental Pathways Associated with Risk of FASD Outcomes
Source: MDPI journal article supplement (doi:10.3390/biom14050569), 2024-05-10
Supplement: s1 [file s1]

**Supplemental Table S6.** Variant Analysis Results of Genes in Retinoic Acid-Regulated Pathways.

| rsID        | Gene            | Type of Mutation | Ref Allele | Presump-<br>-tive Risk Allele | Biological Impact of Variant                                                                                                       | Ref.       | FASD Cohort Risk Allele Count Frequency             | Thousand Genomes Risk Allele Count (Frequency)           | PolyPhen / Sift Prediction    | CADD PHRED Score | Statistic | <i>p</i> -Value        | Passed Benjamini-Hochberg Threshold | Risk or Resilience |
|-------------|-----------------|------------------|------------|-------------------------------|------------------------------------------------------------------------------------------------------------------------------------|------------|-----------------------------------------------------|----------------------------------------------------------|-------------------------------|------------------|-----------|------------------------|-------------------------------------|--------------------|
| rs1805105   | <i>AXIN1</i> *  | Silent           | A          | G                             | G allele associated with cryptorchidism, congenital heart disease and dilated cardiomyopathy                                       | [52,91,92] | 21/46 (0.46)                                        | 6400/10016 (0.64)                                        | NA / NA                       | 0.04             | 6.78      | 3.30×10 <sup>-2</sup>  | No                                  | Resilience         |
| rs117208012 | <i>AXIN1</i> *  | Missense         | C          | T                             | T allele associated with spinal bone mineral density                                                                               | [93]       | 1/46 (0.02)                                         | 90/10016 (9×10 <sup>-3</sup> )                           | Benign / Tolerated            | 15.08            | 54.03     | 1.85×10 <sup>-12</sup> | Yes                                 | Risk               |
| rs1133683   | <i>AXIN2</i> *  | Silent           | G          | AA Genotype                   | AA genotype was associated with increased risk of non-syndromic cleft lip and palate                                               | [44]       | 40/46 (0.87)<br>*genotype count and frequency shown | 5548/10016 (0.55)<br>*genotype count and frequency shown | NA / NA                       | 5.66             | 33.23     | 6.09×10 <sup>-8</sup>  | Yes                                 | Risk               |
| rs2240308   | <i>AXIN2</i> *  | Missense         | G          | A                             | A variant associated with cryptorchidism, congenital heart disease and dilated cardiomyopathy                                      | [52,91,92] | 30/46 (0.65)                                        | 3382/10016 (0.34)                                        | Probably Damaging / Tolerated | 17.48            | 20.44     | 3.64×10 <sup>-5</sup>  | Yes                                 | Risk               |
| rs35415678  | <i>AXIN2</i> *  | Silent           | G          | A                             | A variant disrupts exonic splicing enhancer sequences and potentially contributes to tooth agenesis                                | [94]       | 1/46 (0.02)                                         | 1646/10016 (0.16)                                        | NA / NA                       | 8.26             | 8.45      | 1.50×10 <sup>-3</sup>  | Yes                                 | Resilience         |
| rs1049007   | <i>BMP2</i> *   | Silent           | A          | A                             | A variant is associated with ossification defects in the posterior longitudinal ligament                                           | [57]       | 22/46 (0.47)                                        | 2544/10016 (0.25)                                        | NA / NA                       | 10.67            | 12.75     | 1.70×10 <sup>-3</sup>  | Yes                                 | Risk               |
| rs235768    | <i>BMP2</i> *   | Silent           | A          | T                             | AT genotype is associated with cleft lip and palate, T allele is associated with mandibular retrognathism and ossification defects | [45,51,57] | 26/46 (0.52)                                        | 768/10016 (0.77)                                         | Probably Damaging / Damaging  | 23.4             | 11.16     | 4.00×10 <sup>-3</sup>  | Yes                                 | Resilience         |
| rs17563     | <i>BMP4</i> *   | Missense         | A          | G                             | G alleles is associated with non-syndromic cleft lip and palate                                                                    | [46,47]    | 23/46 (0.5)                                         | 3263/10016 (0.33)                                        | Damaging / Tolerated          | 19.13            | 6.6       | 3.00×10 <sup>-2</sup>  | No                                  | Risk               |
| rs28360477  | <i>CAMKK2</i> * | Missense         | C          | T                             | T allele has damaging SIFT and CADD scores                                                                                         | -          | 5/46 (0.11)                                         | 176/10016 (0.018)                                        | Benign / Damaging             | 19.6             | 47.57     | 4.67×10 <sup>-11</sup> | Yes                                 | Risk               |

|             |                |          |   |   |                                                                                                      |            |               |                                  |                               |       |         |                         |     |            |
|-------------|----------------|----------|---|---|------------------------------------------------------------------------------------------------------|------------|---------------|----------------------------------|-------------------------------|-------|---------|-------------------------|-----|------------|
| rs45498702  | <i>CAVI</i> *  | 3' UTR   | C | T | T allele associated with arterial fibrillation                                                       | [53]       | 3/46 (0.07)   | 414/10016 (0.04)                 | NA / NA                       | 9.61  | 11.22   | 4.00×10 <sup>-3</sup>   | Yes | Risk       |
| rs8940      | <i>CAV2</i> ** | Missense | C | G | G allele has a probably damaging PolyPhen score and damaging SIFT and CADD Scores                    | -          | 15/46 (0.326) | 1412/10016 (0.141)               | Probably Damaging / Damaging  | 23.4  | 14.99   | 5.54×10 <sup>-4</sup>   | Yes | Risk       |
| rs183543237 | <i>DAAM2</i> † | Missense | C | G | G allele has damaging SIFT and CADD scores                                                           | -          | 1/46 (0.02)   | 10/10016 (1×10 <sup>-3</sup> )   | NA / Damaging                 | 24.7  | 434.46  | 4.56×10 <sup>-95</sup>  | Yes | Risk       |
| rs61748650  | <i>DAAM2</i> † | Missense | T | C | C allele has damaging SIFT and CADD scores                                                           | -          | 1/46 (0.02)   | 12/10016 (1.2×10 <sup>-3</sup> ) | NA / Damaging                 | 21.9  | 371.91  | 1.74×10 <sup>-81</sup>  | Yes | Risk       |
| rs145496306 | <i>DVLI</i> *  | Missense | G | A | A allele has a probably damaging PolyPhen score and damaging CADD score                              | -          | 1/46 (0.02)   | 34/10016 (3.4×10 <sup>-3</sup> ) | Probably Damaging / Tolerated | 15.56 | 142.63  | 1.07×10 <sup>-31</sup>  | Yes | Risk       |
| rs117262744 | <i>DVL2</i> *  | Missense | T | C | C variant found in fetal tissue with neural tube defects                                             | [95]       | 1/46 (0.02)   | 64/10016 (6.4×10 <sup>-3</sup> ) | Benign / Tolerated            | 19.2  | 76.42   | 2.55×10 <sup>-17</sup>  | Yes | Risk       |
| rs72839768  | <i>DVL2</i> *  | Missense | G | A | A allele has damaging PolyPhen, SIFT and CADD scores                                                 | -          | 1/46 (0.02)   | 72/10016 (7.2×10 <sup>-3</sup> ) | Damaging / Damaging           | 26.6  | 67.85   | 1.85×10 <sup>-15</sup>  | Yes | Risk       |
| rs1140475   | <i>EGFR</i> *  | Silent   | T | C | Variant located in protein kinase domain, C allele associated with temporomandibular disorder        | [64,65]    | 37/46 (0.80)  | 9182/10016 (0.92)                | NA / NA                       | 0.48  | 12.04   | 2.00×10 <sup>-3</sup>   | Yes | Resilience |
| rs61735303  | <i>FZD4</i> *  | Missense | G | A | A allele associated with familial exudative vitreoretinopathy and retinopathy of prematurity         | [96]       | 1/46 (0.02)   | 148/10016 (0.015)                | Probably Damaging / Tolerated | 24.1  | 32.21   | 1.01×10 <sup>-7</sup>   | Yes | Risk       |
| rs61735304  | <i>FZD4</i> *  | Missense | G | A | A allele has a probably damaging polyphen prediction and damaging CADD score                         | -          | 1/46 (0.02)   | 126/10016 (0.011)                | Probably Damaging / Tolerated | 16.33 | 38.13   | 5.25×10 <sup>-9</sup>   | Yes | Risk       |
| rs61749246  | <i>FZD4</i> *  | 3' UTR   | C | A | A allele associated with retinopathy of prematurity                                                  | [97]       | 3/46 (0.06)   | 108/10016 (0.01)                 | NA / NA                       | 1.44  | 55.77   | 7.75×10 <sup>-13</sup>  | Yes | Risk       |
| rs12549394  | <i>FZD6</i> *  | Missense | C | A | A allele found in patients with neural tube defects                                                  | [95]       | 7/46 (0.15)   | 174/10016 (0.02)                 | Benign / Damaging             | 0.052 | 73.02   | 1.39×10 <sup>-16</sup>  | Yes | Risk       |
| rs201094355 | <i>FZD7</i> †  | Missense | G | T | T allele has probably damaging PolyPhen score and damaging SIFT and CADD scores                      | -          | 2/46 (0.04)   | 2/10016 (2×10 <sup>-4</sup> )    | Probably Damaging / Damaging  | 34    | 1177.82 | 1.74×10 <sup>-256</sup> | Yes | Risk       |
| rs2228226   | <i>GLI1</i> †  | Missense | G | C | C variant results in 50% transactivation activity in vitro, congenital heart defects and hypospadias | [56,98,99] | 18/46 (0.39)  | 5872/10016 (0.59)                | Benign / Tolerated            | 18.95 | 7.23    | 3.00×10 <sup>-2</sup>   | No  | Resilience |

|             |                 |          |   |   |                                                                                              |          |              |                                  |                               |       |         |                         |     |            |
|-------------|-----------------|----------|---|---|----------------------------------------------------------------------------------------------|----------|--------------|----------------------------------|-------------------------------|-------|---------|-------------------------|-----|------------|
| rs150417879 | <i>GLI2</i> *   | Missense | G | A | A allele has probably damaging PolyPhen score and damaging SIFT and CADD scores              | -        | 1/46 (0.02)  | 2/10016 (2×10 <sup>-4</sup> )    | Probably Damaging / Damaging  | 18.73 | 1310.22 | 3.10×10 <sup>-285</sup> | Yes | Resilience |
| rs2592595   | <i>GLI2</i> *   | Silent   | G | A | A variant found in study of ectrodactyly patients                                            | [61]     | 46/46 (1)    | 8286/10016 (0.83)                | NA / Tolerated                | 0.004 | 11.1    | 4.00×10 <sup>-3</sup>   | Yes | Risk       |
| rs35280470  | <i>GLI3</i> *   | Missense | C | T | T allele has a damaging Polyphen, SIFT and CADD scores                                       | -        | 2/46 (0.04)  | 152/10016 (0.015)                | Damaging / Damaging           | 17.71 | 33.4    | 5.60×10 <sup>-8</sup>   | Yes | Resilience |
| rs35364414  | <i>GLI3</i>     | Missense | G | A | A allele is associated with NTD                                                              | [100]    | 2/46 (0.04)  | 192/10016 (0.019)                | Damaging / Damaging           | 28.9  | 25.74   | 2.60×10 <sup>-6</sup>   | Yes | Risk       |
| rs121917710 | <i>GLI3</i>     | Missense | C | T | T allele PolyPhen, SIFT and CADD predictions are damaging, and also found in ASD individuals | [101]    | 1/46 (0.02)  | 26/10016 (3×10 <sup>-3</sup> )   | Probably Damaging / Damaging  | 27.4  | 184.3   | 9.60×10 <sup>-41</sup>  | Yes | Risk       |
| rs45571645  | <i>HOXA1</i> *  | Missense | G | T | T allele has probably Damaging PolyPhen and damaging CADD score                              | -        | 1/46 (0.02)  | 54/10016 (5.4×10 <sup>-3</sup> ) | Probably Damaging / Tolerated | 23.5  | 90.59   | 2.13×10 <sup>-20</sup>  | Yes | Risk       |
| rs35115415  | <i>HOXB1</i> *  | Silent   | C | T | T allele found in ASD patients                                                               | [102]    | 1/46 (0.02)  | 20/10016 (2×10 <sup>-3</sup> )   | NA / NA                       | 11.53 | 235.46  | 7.44×10 <sup>-52</sup>  | Yes | Risk       |
| rs61751489  | <i>NOTCH1</i> * | Missense | C | T | T allele associated with bicuspid aortic valve congenital defects                            | [103]    | 6/46 (0.13)  | 212/10016 (0.02)                 | Benign / Tolerated            | 7.42  | 47.18   | 5.70×10 <sup>-11</sup>  | Yes | Risk       |
| rs76371972  | <i>NOTCH1</i> * | Missense | C | T | T allele with bicuspid aortic valve and aortopathy                                           | [104]    | 2/46 (0.04)  | 70/10016 (7×10 <sup>-3</sup> )   | Probably Damaging / Tolerated | 23.8  | 75.92   | 3.28×10 <sup>-17</sup>  | Yes | Risk       |
| rs61751542  | <i>NOTCH1</i> * | Missense | G | A | A allele is associated bicuspid aortic valve and aortopathy                                  | [104]    | 1/46 (0.02)  | 64/10016 (6×10 <sup>-3</sup> )   | Benign / Tolerated            | 4.04  | 76.42   | 2.55×10 <sup>-17</sup>  | Yes | Risk       |
| rs1044006   | <i>NOTCH3</i> * | Silent   | T | C | C allele is associated with cerebral infarction and mandibular prognathism                   | [48,105] | 33/46 (0.71) | 8732/10016 (0.87)                | NA / NA                       | 0.17  | 12.17   | 2.00×10 <sup>-3</sup>   | Yes | Resilience |
| rs10408676  | <i>NOTCH3</i> * | Missense | C | T | T variant has a damaging PolyPhen and CADD prediction                                        | -        | 1/46 (0.02)  | 846/10016 (0.085)                | Damaging / Tolerated          | 23.5  | 6.82    | 3.30×10 <sup>-2</sup>   | No  | Resilience |
| rs35769976  | <i>NOTCH3</i> * | Missense | C | G | G allele leads to a significant alternation to protein structure                             | [63]     | 1/46 (0.02)  | 1104/10016 (0.11)                | Benign / Tolerated            | 14.94 | 6.78    | 3.30×10 <sup>-2</sup>   | No  | Resilience |
| rs8192591   | <i>NOTCH4</i> * | Missense | C | T | T allele has damaging SIFT and CADD Prediction                                               | -        | 1/46 (0.02)  | 312/10016 (0.0312)               | Benign / Damaging             | 14.7  | 14.68   | 6.50×10 <sup>-4</sup>   | Yes | Resilience |
| rs118133093 | <i>PI4KA</i> †  | Missense | C | G | G allele has damaging SIFT and CADD prediction                                               | -        | 1/46 (0.02)  | 128/10016 (0.0128)               | NA / NA                       | 12.82 | 37.51   | 7.16×10 <sup>-9</sup>   | Yes | Risk       |

|             |                              |          |   |   |                                                                                                                                                             |          |              |                                  |                               |       |        |                         |     |            |
|-------------|------------------------------|----------|---|---|-------------------------------------------------------------------------------------------------------------------------------------------------------------|----------|--------------|----------------------------------|-------------------------------|-------|--------|-------------------------|-----|------------|
| rs139747674 | <i>PRICKLE2</i> <sup>†</sup> | Missense | C | T | T variant is associated with ASD and partial loss of protein function and dendritic arborisation                                                            | [106]    | 1/46 (0.02)  | 16/10016 (0.016)                 | Benign / Tolerated            | 19.3  | 288.52 | 2.24×10 <sup>-63</sup>  | Yes | Risk       |
| rs2066836   | <i>PTCH1</i> <sup>*</sup>    | Silent   | G | G | A allele is associated with reduced risk of non-syndromic cleft lip and palate                                                                              | [49]     | 15/46 (0.33) | 920/10016 (0.092)                | NA / NA                       | 0.05  | 33.71  | 4.80×10 <sup>-8</sup>   | Yes | Resilience |
| rs11573590  | <i>PTCH2</i> <sup>*</sup>    | Missense | G | A | A allele has damaging PolyPhen, SIFT and CADD score                                                                                                         | -        | 2/46 (0.04)  | 630/10016 (0.0634)               | Damaging / Damaging           | 21.5  | 6.78   | 3.40×10 <sup>-2</sup>   | No  | Resilience |
| rs1638630   | <i>PTCHD3</i> <sup>†</sup>   | Missense | T | C | C allele has a probably damaging polyphen score                                                                                                             | -        | 2/46 (0.04)  | 9766/10016 (0.98)                | Probably Damaging / NA        | 5.26  | 19.05  | 7.31×10 <sup>-5</sup>   | Yes | Resilience |
| rs149901958 | <i>RHOD</i>                  | Missense | C | T | T allele has damaging PolyPhen, SIFT and CADD predictions                                                                                                   | -        | 5/46 (0.11)  | 26/10016 (2.6×10 <sup>-3</sup> ) | Damaging / Damaging           | 24.3  | 318.41 | 7.20×10 <sup>-70</sup>  | Yes | Risk       |
| rs35364374  | <i>RYR1</i> <sup>*</sup>     | Missense | G | T | T allele has damaging PolyPhe and CADD scores                                                                                                               | -        | 1/46 (0.02)  | 550/10016 (0.055)                | Damaging / Tolerated          | 19.49 | 8.62   | 1.30×10 <sup>-2</sup>   | Yes | Resilience |
| rs145044872 | <i>RYR1</i> <sup>*</sup>     | Missense | G | A | A allele has probably damaging PolyPhen score and damaging SIFT and CADD score                                                                              | -        | 1/46 (0.02)  | 8/10016 (8×10 <sup>-4</sup> )    | Probably Damaging / Damaging  | 29.6  | 522.03 | 4.40×10 <sup>-114</sup> | Yes | Resilience |
| rs41315858  | <i>RYR2</i> <sup>*</sup>     | Missense | G | A | A allele results in increased Ca <sup>2+</sup> oscillation in response to caffeine and associated with arrhythmogenic right ventricular cardiomyopathy      | [54,107] | 1/46 (0.02)  | 98/10016 (0.01)                  | NA / Tolerated                | 0.12  | 49.5   | 1.78×10 <sup>-11</sup>  | Yes | Risk       |
| rs3766871   | <i>RYR2</i> <sup>*</sup>     | Missense | G | A | The A allele associated with channel destabilization, increased intracellular Ca <sup>2+</sup> oscillation, cardiac arrhythmias and ventricular tachycardia | [54]     | 1/46 (0.02)  | 765/10016 (0.08)                 | NA / Tolerated                | 13.62 | 7.05   | 2.90×10 <sup>-2</sup>   | No  | Resilience |
| rs1802074   | <i>SFRP4</i> <sup>*</sup>    | Missense | C | T | T allele is associated with failing hearts                                                                                                                  | [55]     | 4/46 (0.09)  | 2534/10016 (0.25)                | Benign / Tolerated            | 2.1   | 7.34   | 2.50×10 <sup>-2</sup>   | No  | Resilience |
| rs143647630 | <i>SFRP4</i> <sup>*</sup>    | Missense | C | T | T allele has probably Damaging PolyPhen and damaging CADD score                                                                                             | -        | 1/46 (0.02)  | 10/10016 (1×10 <sup>-3</sup> )   | Probably Damaging / Tolerated | 29.8  | 434.46 | 4.56×10 <sup>-95</sup>  | Yes | Risk       |
| rs139884    | <i>SOX10</i> <sup>*</sup>    | Silent   | A | G | G allele found in patients of Waardenburg Type I and II Syndromes                                                                                           | [50]     | 21/46 (0.46) | 7144/10016 (0.71)                | NA / NA                       | 0.28  | 15.16  | 5.10×10 <sup>-4</sup>   | Yes | Resilience |
| rs61758378  | <i>WNT1</i> <sup>*</sup>     | Missense | T | A | A allele results in an overactive protein, and found in ASD patients                                                                                        | [108]    | 1/46 (0.02)  | 28/10016 (3×10 <sup>-3</sup> )   | Benign / Tolerated            | 16.9  | 171.8  | 4.95×10 <sup>-38</sup>  | Yes | Risk       |
| rs1051886   | <i>WNT10B</i> <sup>*</sup>   | Silent   | G | A | A allele is associated with hip BMD                                                                                                                         | [58]     | 24/46 (0.52) | 3116/10016 (0.31)                | NA / NA                       | 28.1  | 9.79   | 7.00×10 <sup>-3</sup>   | Yes | Risk       |

|             |                 |          |   |   |                                                                                   |          |                 |                                     |                                       |       |        |                        |     |            |
|-------------|-----------------|----------|---|---|-----------------------------------------------------------------------------------|----------|-----------------|-------------------------------------|---------------------------------------|-------|--------|------------------------|-----|------------|
| rs35034312  | <i>WNT10B</i> * | Missense | G | G | G allele stabilizes the beta-catenin complex                                      | [109]    | 45/46<br>(0.98) | 9980/10016<br>(0.99)                | Probably<br>Damaging<br>/ Tolerated   | 9.79  | 134.96 | 4.95×10 <sup>-30</sup> | Yes | Resilience |
| rs121908120 | <i>WNT10A</i> † | Missense | T | A | A allele associated with Odontoonychodermal dysplasia                             | [110]    | 1/46 (0.02)     | 60/10016<br>(6×10 <sup>-3</sup> )   | Damaging<br>/<br>Damaging             | 21.3  | 81.54  | 1.97×10 <sup>-18</sup> | Yes | Risk       |
| rs2908004   | <i>WNT16</i> †  | Missense | G | G | G allele increases gene expression and associated with increased risk of fracture | [59,111] | 31/46<br>(0.67) | 4904/10016<br>(0.49)                | Benign /<br>Tolerated                 | 15.08 | 6.22   | 4.50×10 <sup>-2</sup>  | No  | Risk       |
| rs2707466   | <i>WNT16</i> †  | Missense | C | C | C allele is associated with lower BMD and fractures                               | [60]     | 32/46<br>(0.70) | 4978/10016<br>(0.49)                | Benign /<br>Tolerated                 | 16.8  | 7.23   | 2.70×10 <sup>-2</sup>  | No  | Risk       |
| rs142980721 | <i>WNT2B</i> *  | Missense | G | A | A allele has a probably damaging polyphen score and damaging SIFT score           | -        | 2/46 (0.04)     | 210/10016<br>(0.021)                | Probably<br>Damaging<br>/<br>Damaging | 2.13  | 23.26  | 8.09×10 <sup>-4</sup>  | Yes | Risk       |
| rs41270173  | <i>WNT3A</i> *  | 3' UTR   | G | A | A allele has damaging SIFT and CADD scores                                        | -        | 1/46 (0.02)     | 16/10016<br>(1.6×10 <sup>-3</sup> ) | NA /<br>Damaging                      | 13.3  | 288.52 | 2.24×10 <sup>-63</sup> | Yes | Risk       |
| rs199755858 | <i>WNT8A</i> *  | Missense | C | G | G allele has damaging SIFT and CADD scores                                        | -        | 1/46 (0.02)     | 26/10016<br>(3.6×10 <sup>-3</sup> ) | Benign /<br>Damaging                  | 11.95 | 184.3  | 9.55×10 <sup>-41</sup> | Yes | Risk       |
| rs34072914  | <i>WNT9B</i>    | Silent   | G | T | T allele is associated with Mayer-Rokitansky-Kuster-Hauser Syndrome               | [62]     | 1/46 (0.02)     | 330/10016<br>(0.03)                 | NA / NA                               | 12.75 | 13.86  | 9.00×10 <sup>-4</sup>  | Yes | Resilience |

\* Directly regulated by retinoic acid

† Upstream or downstream of retinoic acid-controlled pathways
