# Supplementary material for: Risk and Resilience Variants in the Retinoic Acid Metabolic and Developmental Pathways Associated with Risk of FASD Outcomes
Source: MDPI journal article supplement (doi:10.3390/biom14050569), 2024-05-10
Supplement: s1 [file s1]

**Supplemental Table S9.** Variants in Genes Found by FASD Diagnosis.

| Genes Shared Between FAS and pFAS*                           | Genes Unique to FAS                                          | Genes Unique to pFAS                                                                                                                                                                               | Genes Unique to ARND | Genes Shared Between FAS, pFAS, and ARND†                                                                                                                                                                                                                                                                             |
|--------------------------------------------------------------|--------------------------------------------------------------|----------------------------------------------------------------------------------------------------------------------------------------------------------------------------------------------------|----------------------|-----------------------------------------------------------------------------------------------------------------------------------------------------------------------------------------------------------------------------------------------------------------------------------------------------------------------|
| <i>DHCR7, FZD4, HTR3D‡, PTCH1, PTCH2, SFRP4, SOX9, STRA6</i> | <i>ARNT2, DAAM2, FABP4, GNB1L, KLHL22, WNT1 WNT3A, WNT8A</i> | <i>A2ML1, ALDH1A2, ANKRD11, BRD4, CES3, CDC42BPG, CHD7, DGAT1, DVL1, DVL2, HIC2, HOXA1, HOXB1, HTR1A, HTR3B, MED15, MID1, PI4KA, PRICKLE2, SNAP29, TSSK2, TXNRD2, WNT10A, WNT2B, WNT9B, ZDHHC8</i> | <i>HTR1E</i>         | <i>ABCA1, ADH1B, ADH1C, ADH4, ADH7, ALDH1B1, ALDH2, AXIN1, AXIN2, BCO2, BMP2, BMP4, CAMKK2, CAV2, CLTCL1, COL10A1, COL1A2, COMT, CYP26C1, DRD2, DRD4, EGFR, FGFR2, FZD6, GLI1, GLI2, HTR2A, HTR5A, LIPC, NCOR1, NCOR2, NOTCH1, NOTCH3, PRODH, PTCH3, P2RX6, OBSL1, RHOD, RXRG, SCARF2, SOX10, TBX1, WNT10B, WNT16</i> |

\*Genes common to FAS and pFAS diagnoses

†Genes common to FAS, pFAS, and ARND diagnoses

‡Did not find any interactions with developmental pathways assessed
