# Supplementary material for: Risk and Resilience Variants in the Retinoic Acid Metabolic and Developmental Pathways Associated with Risk of FASD Outcomes
Source: MDPI journal article supplement (doi:10.3390/biom14050569), 2024-05-10
Supplement: s1 [file s1]

**Supplemental Table S5.** Variant Analysis Results of Retinoic Acid and Alcohol Metabolism Candidate Genes.

| rsID        | Gene         | Type of Mutation | Ref Allele | Presumptive Risk Allele | Biological Impact of Variant                                                                        | Ref.        | FASD Cohort Risk Allele Count Frequency | Thousand Genomes Risk Allele Count (Frequency) | PolyPhen / Sift Prediction    | CADD PHRED Score | Statistic | <i>p</i> -Value        | Passed Benjamini-Hochberg Threshold | Risk or Resilience |
|-------------|--------------|------------------|------------|-------------------------|-----------------------------------------------------------------------------------------------------|-------------|-----------------------------------------|------------------------------------------------|-------------------------------|------------------|-----------|------------------------|-------------------------------------|--------------------|
| rs1229984   | <i>ADH1B</i> | Missense         | T          | C                       | C allele associated with higher levels of alcohol consumption and FASD                              | [32,36, 83] | 45/46 (0.96)                            | 8428/10016 (0.82)                              | Probably Damaging / Tolerated | 14.83            | 8.2       | 1.70×10 <sup>-2</sup>  | No                                  | Risk *             |
| rs113075608 | <i>ADH1B</i> | Missense         | A          | G                       | Variant has damaging PolyPhen score and Sift Score                                                  | -           | 1/46 (0.02)                             | 50/10016 (5×10 <sup>-3</sup> )                 | Damaging / Damaging           | 23.8             | 97.8      | 5.83×10 <sup>-22</sup> | Yes                                 | Risk *             |
| rs2066702   | <i>ADH1B</i> | Missense         | G          | G                       | A allele is noted to be protective against PAE outcomes                                             | [32,85]     | 46/46 (1)                               | 9484/10016 (0.95)                              | NA / NA                       | 26.3             | 10.55     | 5.00×10 <sup>-3</sup>  | Yes                                 | Risk *             |
| rs1612735   | <i>ADH1C</i> | Intron           | T          | C                       | C allele is associated with alcohol dependence                                                      | [72]        | 24/56 (0.52)                            | 2148/10016 (0.21)                              | NA / NA                       | 7.85             | 26.5      | 1.77×10 <sup>-6</sup>  | Yes                                 | Risk               |
| rs698       | <i>ADH1C</i> | Missense         | T          | C                       | C variant 2-fold less kinetically active and associated with alcohol dependence and use             | [38,86]     | 25/46 (0.54)                            | 2146/10016 (0.21)                              | NA / NA                       | 14.59            | 30.28     | 2.66×10 <sup>-6</sup>  | Yes                                 | Risk *             |
| rs2241894   | <i>ADH1C</i> | Silent           | T          | C                       | C allele is associated with alcohol dependence                                                      | [73]        | 4/46 (0.087)                            | 4724/10016 (0.47)                              | Probably Damaging / Tolerated | 0.088            | 27.21     | 1.23×10 <sup>-6</sup>  | Yes                                 | Resilience         |
| rs2298753   | <i>ADH1C</i> | 3' UTR           | T          | C                       | VUS                                                                                                 | -           | 13/46 (0.28)                            | 644/10016 (0.06)                               | NA/NA                         | 6.19             | 41.89     | 7.28×10 <sup>-10</sup> | Yes                                 | — *                |
| rs1614972   | <i>ADH1C</i> | Intron           | C          | C                       | T variant is associated with reduced risk of alcohol dependence                                     | [37]        | 43/46 (0.93)                            | 4804/10016 (0.48)                              | NA / NA                       | 4.8              | 37.99     | 5.61×10 <sup>-9</sup>  | Yes                                 | Risk *             |
| rs1042364   | <i>ADH4</i>  | 3' UTR           | T          | T                       | T allele is associated with alcohol dependence                                                      | [39]        | 8/46 (0.17)                             | 1174/10016 (0.11)                              | NA / NA                       | 6.24             | 4.24      | 1.20×10 <sup>-1</sup>  | No                                  | —                  |
| rs1126671   | <i>ADH4</i>  | Missense         | T          | T                       | T variant affects alcohol binding and protein stability. T allele is assoc. with alcohol dependence | [87]        | 11/46 (0.24)                            | 1532/10016 (0.15)                              | Probably Damaging / Tolerated | 0.005            | 4.47      | 1.07×10 <sup>-1</sup>  | No                                  | Resilience         |
| rs3762894   | <i>ADH4</i>  | Upstream         | T          | T                       | A allele – less alcohol consumption; T variant with alcohol dependence                              | [39]        | 42/46 (0.91)                            | 6824/10016 (0.68)                              | NA / NA                       | 0.39             | 11.65     | 4.00×10 <sup>-3</sup>  | Yes                                 | Risk *             |
| rs971074    | <i>ADH7</i>  | Silent           | C          | T                       | T allele is associated with heroin addition                                                         | [74]        | 10/46 (0.22)                            | 1200/10016 (0.12)                              | NA / NA                       | 7.79             | 6.84      | 3.20×10 <sup>-2</sup>  | No                                  | Risk               |
| rs1154470   | <i>ADH7</i>  | Upstream         | G          | A                       | A variant associated with alcohol use disorders                                                     | [88]        | 15/46 (0.33)                            | 2424/10016 (0.24)                              | NA / NA                       | 0.72             | 2.48      | 2.90×10 <sup>-1</sup>  | No                                  | —                  |

|             |                |          |   |   |                                                                                                 |         |                 |                                   |                               |       |        |                         |     |            |
|-------------|----------------|----------|---|---|-------------------------------------------------------------------------------------------------|---------|-----------------|-----------------------------------|-------------------------------|-------|--------|-------------------------|-----|------------|
| rs4646626   | <i>ALDH1A2</i> | Missense | C | T | T variant found in Tetralogy of Fallot patients                                                 | [89]    | 23/46<br>(0.50) | 3734/10016<br>(0.37)              | Begin / Tolerated             | 17.53 | 2.31   | 3.10×10 <sup>-1</sup>   | No  | — *        |
| rs16939660  | <i>ALDH1A2</i> | Silent   | T | C | C variant found in patients with congenital heart defects, spina bifida and neural tube defects | [89,90] | 1/46 (0.02)     | 110/10016<br>(0.01)               | NA / NA                       | 10.19 | 43.92  | 2.90×10 <sup>-10</sup>  | Yes | Risk       |
| rs2073478   | <i>ALDH1B1</i> | Missense | G | G | TT genotype has been shown to be protective against drinking                                    | [75]    | 19/46<br>(0.41) | 6060/10016<br>(0.60)              | Probably Damaging / Damaging  | 20.8  | 7.15   | 3.00×10 <sup>-2</sup>   | No  | Resilience |
| rs671       | <i>ALDH2</i>   | Missense | G | G | A allele – reduced alcohol consumption and flushing; enzyme nearly inactive                     | [40]    | 46/46 (1)       | 9658/10016<br>(0.96)              | NA / NA                       | 33    | 14.24  | 8.10×10 <sup>-4</sup>   | Yes | Risk *     |
| rs10891338  | <i>BCO2</i>    | Missense | T | C | C allele has a probably Damaging PolyPhen and damaging CADD score                               | -       | 46/46 (1)       | 9720/10016<br>(0.97)              | Probably Damaging / Tolerated | 16.04 | 16.86  | 2.20×10 <sup>-4</sup>   | Yes | Risk       |
| rs35361223  | <i>BCO2</i>    | Missense | C | G | G allele has a damaging SIFT prediction                                                         | -       | 2/46 (0.04)     | 184/10016<br>(0.02)               | Benign / Damaging             | 7.127 | 68.53  | 1.37×10 <sup>-6</sup>   | Yes | Risk *     |
| rs61743167  | <i>CES3</i>    | Missense | C | T | T allele has a damaging SIFT and CADD prediction                                                | -       | 1/46 (0.02)     | 114/10016<br>(0.011)              | Benign / Damaging             | 16.67 | 42.32  | 6.45×10 <sup>-10</sup>  | Yes | Risk       |
| rs12263200  | <i>CYP26C1</i> | Intron   | G | G | T allele has a damaging SIFT prediction                                                         | -       | 27/46<br>(0.59) | 1224/10016<br>(0.12)              | NA / Damaging                 | 2.71  | 93.39  | 1.00×10 <sup>-3</sup>   | Yes | Risk *     |
| rs58993699  | <i>CYP26C1</i> | Intron   | C | C | T allele has a damaging SIFT and CADD prediction                                                | -       | 45/46<br>(0.96) | 9686/10016<br>(0.97)              | NA / Damaging                 | 14.23 | 11.86  | 1.00×10 <sup>-3</sup>   | Yes | Risk       |
| rs55962377  | <i>DGAT1</i>   | Missense | G | T | T allele has damaging PolyPhen and CADD Score                                                   | -       | 1/46 (0.02)     | 360/10016<br>(0.036)              | Probably Damaging / Tolerated | 18.73 | 12.69  | 2.00×10 <sup>-3</sup>   | Yes | Resilience |
| rs148632765 | <i>FABP4</i>   | Missense | C | G | G allele has damaging PolyPhen and CADD Score                                                   | -       | 1/46 (0.02)     | 4/10016<br>(4×10 <sup>-4</sup> )  | Probably Damaging / Tolerated | 22    | 872.33 | 3.77×10 <sup>-190</sup> | Yes | Risk       |
| rs3829462   | <i>LIPC</i>    | Missense | C | A | A allele has damaging PolyPhen and CADD Score                                                   | -       | 30/46<br>(0.65) | 9376/10016<br>(0.94)              | Probably Damaging / Tolerated | 20.6  | 68.69  | 3.30×10 <sup>-15</sup>  | Yes | Resilience |
| rs61753150  | <i>NCOR1</i>   | Missense | T | T | G allele has probably damaging PolyPhen score and damaging SIFT and CADD Score                  | -       | 1/46 (0.02)     | 40/10016<br>(4×10 <sup>-3</sup> ) | Probably Damaging / Damaging  | 22.3  | 121.8  | 3.55×10 <sup>-27</sup>  | Yes | Risk       |
| rs2227277   | <i>NCOR2</i>   | Missense | C | C | T allele has probably damaging PolyPhen score and damaging SIFT and CADD Score                  | -       | 3/46<br>(0.065) | 574/10016<br>(0.06)               | Probably Damaging / Damaging  | 17.1  | 7.29   | 3.00×10 <sup>-2</sup>   | No  | Resilience |

|            |              |          |   |   |                                                                                        |      |                 |                      |                  |      |       |                       |     |        |
|------------|--------------|----------|---|---|----------------------------------------------------------------------------------------|------|-----------------|----------------------|------------------|------|-------|-----------------------|-----|--------|
| rs2134095  | <i>RXRG</i>  | Silent   | G | A | A allele is associated with lower cholesterol levels and gestational diabetes mellitus | [41] | 33/46<br>(0.72) | 4796/10316<br>(0.48) | NA / NA          | 5.66 | 12.43 | 2.80×10 <sup>-3</sup> | Yes | Risk * |
| rs971756   | <i>STRA6</i> | Missense | A | T | T variant found in a patient with Matthew-Woods Syndrome                               | [42] | 6/46 (0.13)     | 546/10016<br>(0.05)  | NA /<br>Damaging | 3.86 | 12.71 | 2.00×10 <sup>-3</sup> | Yes | Risk * |
| rs11857410 | <i>STRA6</i> | Silent   | G | A | A allele found with ano- and microphthalmia; and with Matthew-Wood Syndrome            | [43] | 6/46 (0.13)     | 618/10016<br>(0.06)  | NA / NA          | 8.72 | 10.3  | 5.00×10 <sup>-3</sup> | Yes | Risk * |

\* Genotype validated by TaqMan
