# Supplementary material for: Risk and Resilience Variants in the Retinoic Acid Metabolic and Developmental Pathways Associated with Risk of FASD Outcomes
Source: MDPI journal article supplement (doi:10.3390/biom14050569), 2024-05-10
Supplement: s1 [file s1]

**Supplemental Table S1.** Retinoic Acid and Ethanol Metabolism Gene Candidate List.

| <b>Gene</b>    | <b>Biological Role of Gene</b>                                                                             |
|----------------|------------------------------------------------------------------------------------------------------------|
| <i>ADH1B</i>   | Converts ethanol to acetaldehyde and retinol to RA                                                         |
| <i>ADH1C</i>   | Converts ethanol to acetaldehyde and retinol to RA                                                         |
| <i>ADH4</i>    | Converts ethanol to acetaldehyde and retinol to RA                                                         |
| <i>ADH7</i>    | Converts ethanol to acetaldehyde and retinol to RA                                                         |
| <i>ADHFE1</i>  | Converts ethanol to acetaldehyde and retinol to RA                                                         |
| <i>ALDH1/1</i> | Acetaldehyde to acetic acid and retinaldehyde to RA                                                        |
| <i>ALDH1/2</i> | Acetaldehyde to acetic acid and retinaldehyde to RA                                                        |
| <i>ALDH2A1</i> | Acetaldehyde to acetic acid and retinaldehyde to RA                                                        |
| <i>ALDH2A2</i> | Acetaldehyde to acetic acid and retinaldehyde to RA                                                        |
| <i>ALDHA3</i>  | Acetaldehyde to acetic acid and retinaldehyde to RA                                                        |
| <i>BCO1</i>    | Cleaves $\beta$ -carotene to form two retinal molecules                                                    |
| <i>BCO2</i>    | Cleaves $\beta$ -carotene to form apocarotenoids                                                           |
| <i>BCO2L</i>   | Cleaves $\beta$ -carotene to form apocarotenoids                                                           |
| <i>CES3</i>    | Esterification of retinyl esters                                                                           |
| <i>CRAB1</i>   | Transports retinoic acid in the cell                                                                       |
| <i>CRAB2</i>   | Transports retinoic acid in the cell                                                                       |
| <i>CRBP</i>    | Mediates both retinol esterification to retinyl esters and retinol oxidation to retinal and retinoic acid. |
| <i>CYP26A1</i> | Degradation of retinoic acid                                                                               |
| <i>CYP26B1</i> | Degradation of retinoic acid                                                                               |
| <i>CYP26C1</i> | Degradation of retinoic acid                                                                               |
| <i>DGAT1</i>   | Esterification of retinol esters                                                                           |
| <i>DHRS3</i>   | Reduction of retinaldehyde to retinol                                                                      |
| <i>DHRS9</i>   | Reduction of retinaldehyde to retinol                                                                      |
| <i>FABP3</i>   | Mobilization of retinoic acid                                                                              |
| <i>FABP4</i>   | Mobilization of retinoic acid                                                                              |
| <i>LIPC</i>    | Mobilization of retinoic acid                                                                              |
| <i>LRAT</i>    | Creates retinyl esters                                                                                     |
| <i>NCOR1</i>   | Represses retinoic acid mediated transcription                                                             |
| <i>NCOR2</i>   | Represses retinoic acid mediated transcription                                                             |
| <i>PNLIP</i>   | Creates retinol from retinyl esters                                                                        |
| <i>PNPLA4</i>  | Creates retinol from retinyl esters                                                                        |
| <i>RARA</i>    | Retinoic acid mediated transcription factor                                                                |
| <i>RARB</i>    | Retinoic acid mediated transcription factor                                                                |
| <i>RARG</i>    | Retinoic acid mediated transcription factor                                                                |
| <i>RBP4</i>    | Transport of retinol                                                                                       |
| <i>RDH11</i>   | Transport of retinol                                                                                       |
| <i>RDH13</i>   | Transport of retinol                                                                                       |
| <i>RDH14</i>   | Transport of retinol                                                                                       |
| <i>RDH16</i>   | Transport of retinol                                                                                       |
| <i>RDH5</i>    | Retinoic acid mediated transcription factor                                                                |
| <i>RXRA</i>    | Retinoic acid mediated transcription factor                                                                |
| <i>RXRB</i>    | Retinoic acid mediated transcription factor                                                                |

|                               |                                              |
|-------------------------------|----------------------------------------------|
| <i>RXR<math>\alpha</math></i> | Retinoic acid mediated transcription factor  |
| <i>SCARB1</i>                 | Creates retinaldehyde from $\beta$ -carotene |
| <i>SDR16C5</i>                | Converts retinol into retinaldehyde          |
| <i>STRA6</i>                  | Transports retinol into the cell             |

---
