# Supplementary material for: Risk and Resilience Variants in the Retinoic Acid Metabolic and Developmental Pathways Associated with Risk of FASD Outcomes
Source: MDPI journal article supplement (doi:10.3390/biom14050569), 2024-05-10
Supplement: s1 [file s1]

**Supplemental Table S7.** Variant Analysis Results of the Causative Genes of Rare Neurodevelopmental Disorders.

| rsID        | Gene                         | Type of Mutation | Ref Allele | Presumptive Risk Allele | Biological Impact of Variant                                                   | Ref.  | FASD Cohort Risk Allele Count Frequency | Thousand Genomes Risk Allele Count (Frequency) | PolyPhen / Sift Prediction   | CADD PHRED Score | Statistic | p-Value                 | Passed Benjamini-Hochberg Threshold | Risk or Resilience |
|-------------|------------------------------|------------------|------------|-------------------------|--------------------------------------------------------------------------------|-------|-----------------------------------------|------------------------------------------------|------------------------------|------------------|-----------|-------------------------|-------------------------------------|--------------------|
| rs61921916  | <i>A2ML1</i>                 | Missense         | C          | A                       | A allele has damaging CADD and PolyPhen prediction                             | -     | 1/46 (0.02)                             | 30/10016 (3×10 <sup>-3</sup> )                 | Damaging / Tolerated         | 19.55            | 160.86    | 1.18×10 <sup>-35</sup>  | Yes                                 | Risk               |
| rs2230808   | <i>ABCA1</i>                 | Missense         | T          | C                       | C allele associated with more severe SLOS phenotypes in SLOS patients          | [69]  | 35/46 (0.76)                            | 5392/10016 (0.58)                              | Benign / Tolerated           | 22               | 9.14      | 1.00×10 <sup>-2</sup>   | Yes                                 | Risk               |
| rs145694621 | <i>ANKRD11</i> <sup>‡</sup>  | Missense         | G          | C                       | C allele has damaging Polyphen and SIFT score                                  | -     | 1/46 (0.02)                             | 50/10016 (5×10 <sup>-3</sup> )                 | Benign / Damaging            | 0.13             | 110.94    | 8.11×10 <sup>-25</sup>  | Yes                                 | Risk               |
| rs80068543  | <i>ARVCF</i> <sup>*</sup>    | Missense         | C          | T                       | T allele associated with Hirschsprung's Disease                                | [112] | 1/46 (0.02)                             | 368/10016 (0.04)                               | Benign / Tolerated           | 17.93            | 12.41     | 2.00×10 <sup>-3</sup>   | Yes                                 | Resilience         |
| rs115344498 | <i>ARVCF</i> <sup>*</sup>    | Missense         | A          | G                       | G allele has damaging SIFT and CADD Score                                      | -     | 1/46 (0.02)                             | 6/10016 (6×10 <sup>-4</sup> )                  | Benign / Damaging            | 22               | 653.39    | 1.31×10 <sup>-142</sup> | Yes                                 | Risk               |
| rs35676845  | <i>BRD4</i> <sup>*</sup>     | Missense         | C          | T                       | T allele has probably damaging PolyPhen score and damaging SIFT and CADD Score | -     | 1/46 (0.02)                             | 62/10016 (6×10 <sup>-3</sup> )                 | Probably Damaging / Damaging | 26.7             | 78.9      | 7.38×10 <sup>-18</sup>  | Yes                                 | Risk               |
| rs3208856   | <i>CBLC</i> <sup>*</sup>     | Missense         | C          | T                       | T allele has damaging PolyPhen, SIFT and CADD scores                           | -     | 4/46 (0.087)                            | 194/10016 (0.02)                               | Damaging / Damaging          | 15.71            | 34.6      | 3.08×10 <sup>-8</sup>   | Yes                                 | Risk               |
| rs11231887  | <i>CDC42BPG</i> <sup>*</sup> | Missense         | C          | T                       | T allele has a damaging Polyphen and CADD score                                | -     | 1/46 (0.02)                             | 190/10016 (0.019)                              | Damaging / Tolerated         | 24.2             | 24.74     | 4.24×10 <sup>-6</sup>   | Yes                                 | Risk               |
| rs55975541  | <i>CDC42BPG</i> <sup>*</sup> | Missense         | G          | A                       | A allele has damaging PolyPhen, SIFT and CADD predictions                      | -     | 5/46 (0.11)                             | 296/10016 (0.03)                               | Damaging / Damaging          | 28.9             | 25.03     | 3.66×10 <sup>-6</sup>   | Yes                                 | Risk               |
| rs41272435  | <i>CHD7</i> <sup>‡</sup>     | Missense         | T          | A                       | A allele has damaging SIFT and CADD predictions                                | -     | 3/46 (0.065)                            | 52/10016 (5.2×10 <sup>-3</sup> )               | NA / Damaging                | 22.5             | 118.19    | 2.16×10 <sup>-26</sup>  | Yes                                 | Risk               |
| rs186499367 | <i>CHD7</i> <sup>‡</sup>     | Missense         | G          | T                       | G allele has damaging SIFT and CADD predictions                                | -     | 1/46 (0.02)                             | 2/10016 (2×10 <sup>-4</sup> )                  | NA / Damaging                | 25               | 1310.22   | 3.08×10 <sup>-285</sup> | Yes                                 | Risk               |
| rs199828744 | <i>CHD7</i> <sup>‡</sup>     | Silent           | C          | G                       | G allele found in two CHARGE syndrome patients                                 | [113] | 1/46 (0.02)                             | 2/10016 (2×10 <sup>-4</sup> )                  | NA / NA                      | 0.53             | 1310.22   | 3.10×10 <sup>-285</sup> | Yes                                 | Risk               |

|             |                           |          |   |   |                                                                                                               |       |              |                                  |                               |       |        |                         |     |      |
|-------------|---------------------------|----------|---|---|---------------------------------------------------------------------------------------------------------------|-------|--------------|----------------------------------|-------------------------------|-------|--------|-------------------------|-----|------|
| rs712952    | <i>CLTCL1</i> †           | Missense | G | A | A allele has a damaging SIFT and CADD scores                                                                  | -     | 5/46 (0.11)  | 510/10016 (0.0509)               | NA / Damaging                 | 15.88 | 11.42  | 3.30×10 <sup>-3</sup>   | Yes | Risk |
| rs807459    | <i>CLTCL1</i> †           | Missense | T | C | C allele has a damaging SIFT and CADD scores                                                                  | -     | 5/46 (0.11)  | 552/10016 (0.0551)               | NA / Damaging                 | 15.88 | 10.06  | 6.50×10 <sup>-3</sup>   | Yes | Risk |
| rs147685377 | <i>CLTCL1</i> †           | Missense | T | C | C allele has a damaging SIFT and CADD predictions                                                             | -     | 1/46 (0.02)  | 6/10016 (6×10 <sup>-4</sup> )    | NA / Damaging                 | 20.8  | 653.39 | 1.32×10 <sup>-142</sup> | Yes | Risk |
| rs190351859 | <i>CLTCL1</i> †           | Missense | G | A | A allele has a damaging PolyPhen and CADD predictions                                                         | -     | 2/46 (0.04)  | 64/10016 (6×10 <sup>-3</sup> )   | NA / Damaging                 | 22.5  | 83.15  | 8.80×10 <sup>-19</sup>  | Yes | Risk |
| rs769224    | <i>COMT</i>               | Silent   | G | G | G allele associated with heroin usage                                                                         | [114] | 44/46 (0/96) | 9512/10016 (0.95)                | NA / NA                       | 2.57  | 8.5    | 1.40×10 <sup>-2</sup>   | Yes | Risk |
| rs61732148  | <i>CUL7</i> †             | Missense | G | A | A allele has damaging SIFT and CADD predictions                                                               | -     | 2/46 (0.04)  | 172/10016 (0.0172)               | Benign / Damaging             | 21.1  | 29.12  | 4.75×10 <sup>-7</sup>   | Yes | Risk |
| rs138659167 | <i>DHCR7</i> <sup>d</sup> | Missense | C | G | G allele is a pathogenic variant for SLOS, homozygosity leads to a severe SLOS phenotype or early miscarriage | [71]  | 2/46 (0.04)  | 26/10016 (3×10 <sup>-3</sup> )   | NA / NA                       | 34    | 198.69 | 7.17×10 <sup>-44</sup>  | Yes | Risk |
| rs75659311  | <i>FGD1</i> †             | Missense | G | A | A allele has a probably damaging PolyPhen score and damaging SIFT Score                                       | -     | 2/46 (0.04)  | 180/10016 (0.0238)               | Probably Damaging / Damaging  | 8.42  | 20.03  | 4.48×10 <sup>-5</sup>   | Yes | Risk |
| rs1047057   | <i>FGFR2</i> *            | Silent   | G | A | A allele found in a patient in Apert's Syndrome                                                               | [67]  | 30/46 (0.65) | 4150/10016 (0.41)                | NA / NA                       | 18.4  | 10.73  | 5.00×10 <sup>-3</sup>   | Yes | Risk |
| rs3750819   | <i>FGFR2</i> *            | Missense | C | A | A allele has damaging SIFT and CADD predictions                                                               | -     | 1/46 (0.02)  | 126/10016 (0.0126)               | Probably Damaging / Tolerated | 20.1  | 87.36  | 1.10×10 <sup>-19</sup>  | Yes | Risk |
| rs73148914  | <i>GNB1L</i>              | Missense | G | A | A allele has probably damaging PolyPhen score and damaging SIFT and CADD Scores                               | -     | 1/46 (0.02)  | 60/10016 (6×10 <sup>-3</sup> )   | Probably Damaging / Damaging  | 21.1  | 81.54  | 1.97×10 <sup>-18</sup>  | Yes | Risk |
| rs2287256   | <i>KLHL22</i>             | 3' UTR   | C | T | T allele has a damaging SIFT score                                                                            | -     | 1/46 (0.02)  | 140/10016 (0.014)                | NA / Damaging                 | 7.1   | 34.15  | 3.84×10 <sup>-8</sup>   | Yes | Risk |
| rs80230662  | <i>HIC2</i>               | Missense | C | T | T allele has probably damaging PolyPhen score and damaging CADD score                                         | -     | 2/46 (0.04)  | 214/10016 (0.0214)               | Damaging / Tolerated          | 19.69 | 22.77  | 1.14×10 <sup>-5</sup>   | Yes | Risk |
| rs201035504 | <i>MED15</i>              | Missense | C | A | A allele has probably damaging PolyPhen score and damaging SIFT and CADD Scores                               | -     | 2/46 (0.04)  | 6/10016 (6×10 <sup>-4</sup> )    | Probably Damaging / Damaging  | 25    | 651.95 | 2.70×10 <sup>-142</sup> | Yes | Risk |
| rs147106995 | <i>MID1</i> †             | Missense | G | A | A allele has damaging PolyPhen, SIFT and CADD Scores                                                          | -     | 1/46 (0.02)  | 64/10016 (8.5×10 <sup>-3</sup> ) | Damaging / Damaging           | 23.9  | 57.01  | 4.17×10 <sup>-13</sup>  | Yes | Risk |

|             |               |          |   |   |                                                                                                                                           |            |              |                                   |                               |       |         |                         |     |            |
|-------------|---------------|----------|---|---|-------------------------------------------------------------------------------------------------------------------------------------------|------------|--------------|-----------------------------------|-------------------------------|-------|---------|-------------------------|-----|------------|
| rs10932816  | <i>OBSL1</i>  | Silent   | A | G | G allele has a damaging SIFT prediction                                                                                                   | -          | 46/46 (1)    | 9652/10016 (0.9637)               | NA / Damaging                 | 0.17  | 14.04   | $8.90 \times 10^{-4}$   | Yes | Risk       |
| rs147763320 | <i>OBSL1</i>  | Missense | G | T | T allele has a damaging SIFT and CADD predictions                                                                                         | -          | 1/46 (0.02)  | 2/10016 ( $2 \times 10^{-4}$ )    | NA / Damaging                 | 24.8  | 1310.22 | $3.08 \times 10^{-285}$ | Yes | Risk       |
| rs4819756   | <i>PRODH</i>  | Missense | A | A | A allele results in 30-70% drop in enzymatic activity and associated with Schizophrenia                                                   | [115, 116] | 25/46 (0.54) | 2194/10016 (0.22)                 | Probably Damaging / Tolerated | 8.57  | 28.94   | $5.20 \times 10^{-7}$   | Yes | Risk       |
| rs2277838   | <i>P2RX6</i>  | Missense | G | A | A allele has a damaging SIFT score                                                                                                        | -          | 6/46 (0.13)  | 780/10016 (0.0779)                | NA / Damaging                 | 23    | 6.69    | $3.50 \times 10^{-2}$   | No  | Resilience |
| rs2227902   | <i>REST*</i>  | Missense | G | T | T allele is associated with hippocampal volume loss and impairment in memory                                                              | [117, 118] | 4/46 (0.087) | 646/10016 (0.065)                 | Probably Damaging / Tolerated | 6.29  | 6.65    | $3.60 \times 10^{-2}$   | No  | Risk       |
| rs61748756  | <i>REST*</i>  | Missense | C | G | G allele has damaging SIFT prediction                                                                                                     | -          | 2/46 (0.04)  | 60/10016 ( $6 \times 10^{-3}$ )   | Benign / Damaging             | 0.16  | 88.74   | $5.38 \times 10^{-20}$  | Yes | Risk       |
| rs361566    | <i>SCARF2</i> | Missense | G | A | A allele has a damaging PolyPhen and CADD scores                                                                                          | -          | 9/46 (0.195) | 1126/10016 (0.1124)               | Damaging / Tolerated          | 27.3  | 6.16    | $4.60 \times 10^{-2}$   | No  | Risk       |
| rs874100    | <i>SCARF2</i> | Missense | G | C | C allele has a probably damaging PolyPhen score and damaging SIFT and CADD scores                                                         | -          | 2/46 (0.04)  | 2426/10016 (0.2422)               | Probably Damaging / Damaging  | 11.35 | 10.61   | $5.00 \times 10^{-3}$   | Yes | Resilience |
| rs874101    | <i>SCARF2</i> | Missense | G | C | C allele has a probably damaging PolyPhen score                                                                                           | -          | 15/46 (0.33) | 5354/10016 (0.5345)               | Probably Damaging / Tolerated | 7.37  | 8       | $1.80 \times 10^{-2}$   | Yes | Resilience |
| rs116892729 | <i>SNAP29</i> | Missense | A | G | G allele has a damaging SIFT and CADD scores                                                                                              | -          | 1/46 (0.02)  | 140/10016 (0.014)                 | Benign / Damaging             | 24.8  | 34.15   | $3.84 \times 10^{-8}$   | Yes | Risk       |
| rs2229989   | <i>SOX9*</i>  | Silent   | C | T | G and A allele are associated with reduced transactivation capacity of the SOX9 protein and are associated with mild campomelic dysplasia | [66]       | 11/46 (0.24) | 1368/10016 (0.14)                 | NA / NA                       | 11.83 | 6.3     | $4.00 \times 10^{-2}$   | No  | Risk       |
| rs41298840  | <i>TBX1*</i>  | Silent   | G | A | A allele is enriched in 22q11.2DS children                                                                                                | [119]      | 42/46 (0.91) | 7706/10016 (0.77)                 | NA / NA                       | 11.64 | 6.16    | $4.50 \times 10^{-2}$   | No  | Risk       |
| rs5746826   | <i>TBX1*</i>  | 3' UTR   | A | T | T allele is associated with poor executive functioning in patients with schizophrenia                                                     | [120]      | 14/46 (0.30) | 5936/10016 (0.59)                 | NA / NA                       | 0.25  | 15.82   | $4.00 \times 10^{-4}$   | Yes | Resilience |
| rs3747052   | <i>TSSK2</i>  | Missense | A | G | G allele has a damaging SIFT and CADD scores                                                                                              | -          | 1/46 (0.02)  | 392/10016 (0.0391)                | Benign / Damaging             | 11.22 | 11.66   | $2.90 \times 10^{-3}$   | Yes | Resilience |
| rs148092370 | <i>TXNRD2</i> | Missense | T | A | A allele has a damaging Polyphen and damaging SIFT score                                                                                  | -          | 1/46 (0.02)  | 12/10016 ( $1.2 \times 10^{-3}$ ) | Damaging / Damaging           | 8.55  | 371.91  | $1.74 \times 10^{-81}$  | Yes | Risk       |

|           |        |          |   |   |                                    |   |             |                    |               |      |     |                       |     |      |
|-----------|--------|----------|---|---|------------------------------------|---|-------------|--------------------|---------------|------|-----|-----------------------|-----|------|
| rs2871053 | ZDHHC8 | Upstream | T | C | C allele has a damaging SIFT score | - | 3/46 (0.07) | 506/10016 (0.0505) | NA / Damaging | 3.51 | 8.6 | 1.40×10 <sup>-2</sup> | Yes | Risk |
|-----------|--------|----------|---|---|------------------------------------|---|-------------|--------------------|---------------|------|-----|-----------------------|-----|------|

\*Directly regulated by retinoic acid

†Upstream or downstream of retinoic acid-controlled pathways

‡Regulates RA metabolism genes

Δ Genotype validated by TaqMan
