# Supplementary material for: Risk and Resilience Variants in the Retinoic Acid Metabolic and Developmental Pathways Associated with Risk of FASD Outcomes
Source: MDPI journal article supplement (doi:10.3390/biom14050569), 2024-05-10
Supplement: s1 [file s1]

**Supplemental Table S2.** Retinoic Acid-Dependent Signaling Network Candidate Genes.

| <b>Gene</b>       | <b>Signaling Pathway Involved</b>    |
|-------------------|--------------------------------------|
| <i>ABCA1</i>      | Cholesterol Metabolism/SHH           |
| <i>ADAMTSL2</i>   | TGF-Beta protein storage             |
| <i>ADDUCIN</i>    | Rho Kinase Signaling                 |
| <i>APOE</i>       | Cholesterol Metabolism/SHH           |
| <i>AXIN1</i>      | WNT Signaling                        |
| <i>AXIN2</i>      | WNT Signaling                        |
| <i>BMP2</i>       | SMAD Signaling                       |
| <i>BMP4</i>       | SMAD Signaling                       |
| <i>CAMK</i> genes | Ca <sup>2+</sup> Dependent Signaling |
| <i>CAV</i> genes  | ERK/Cholesterol Dependent Signaling  |
| <i>CELSR</i>      | PCP WNT Signaling                    |
| <i>CTNNB1</i>     | Canonical WNT Signaling              |
| <i>CYP51</i>      | Cholesterol Metabolism/SHH           |
| <i>DAAM</i> genes | Wnt signaling                        |
| <i>DVL</i> genes  | WNT signaling                        |
| <i>EGF</i>        | MAPK/EGF                             |
| <i>EGFR</i> genes | MAPK/EGF                             |
| <i>ENOS</i> genes | Rho Kinase Signaling                 |
| <i>EPAC</i> genes | Rho Kinase Signaling                 |
| <i>FDFT1</i>      | Cholesterol Metabolism/SHH           |
| <i>FDPS</i>       | Cholesterol Metabolism/SHH           |
| <i>FGF8</i>       | MAPK/FGF                             |
| <i>FGFR</i> genes | MAPK/FGF                             |
| <i>FZD</i> genes  | Wnt signaling                        |
| <i>GLI1</i>       | SHH pathway                          |
| <i>GLI2</i>       | SHH pathway                          |
| <i>GLI3</i>       | SHH pathway                          |
| <i>GSK3B</i>      | WNT signaling                        |
| <i>HMGCR</i>      | Cholesterol Metabolism/SHH           |
| <i>HOXA1</i>      | Hox Signaling                        |
| <i>HOXA2</i>      | Hox Signaling                        |
| <i>HOXB1</i>      | Hox Signaling                        |
| <i>HOXB2</i>      | Hox Signaling                        |
| <i>ID11</i>       | Cholesterol Metabolism/SHH           |
| <i>IHH</i>        | SHH signaling                        |
| <i>INSIG1</i>     | Cholesterol Metabolism/SHH           |
| <i>INSIG2</i>     | Cholesterol Metabolism/SHH           |
| <i>L1CAM</i>      | RasMAPK Signaling                    |
| <i>LSS</i>        | Cholesterol Metabolism/SHH           |
| <i>MAP2K1</i>     | RasMAPK Signaling                    |
| <i>MAP2K2</i>     | RasMAPK Signaling                    |
| <i>MVD</i>        | Cholesterol Metabolism/SHH           |

|                         |                            |
|-------------------------|----------------------------|
| <i>MVK</i>              | Cholesterol Metabolism/SHH |
| <i>NODAL</i>            | TGF-Beta signaling         |
| <i>NOTCH</i> genes      | NOTCH signaling            |
| <i>NSDHL</i>            | Cholesterol Metabolism/SHH |
| <i>PEX11B</i>           | Cholesterol Metabolism/SHH |
| <i>PEX14</i>            | Cholesterol Metabolism/SHH |
| <i>PEX19</i>            | Cholesterol Metabolism/SHH |
| <i>PI4KA</i>            | Cholesterol Metabolism/SHH |
| <i>PKC</i>              | Calcium Signaling          |
| <i>PMVK</i>             | Cholesterol Metabolism/SHH |
| <i>PRICKLE</i> genes    | WNT PCP signaling          |
| <i>PTCH</i> genes       | SHH pathway                |
| <i>RAC</i>              | Cholesterol Metabolism/SHH |
| <i>RAP1</i>             | Cholesterol Metabolism/SHH |
| <i>RHO</i> kinase genes | Cholesterol Metabolism/SHH |
| <i>ROCK</i> genes       | Cholesterol Metabolism/SHH |
| <i>RYR</i> genes        | Cholesterol Metabolism/SHH |
| <i>SFRP</i> genes       | Calcium Signaling          |
| <i>SHH</i>              | Cholesterol Metabolism/SHH |
| <i>SMO</i>              | WNT PCP signaling          |
| <i>SOX10</i>            | SHH pathway                |
| <i>SQLE</i>             | Cholesterol Metabolism/SHH |
| <i>SUFU</i>             | Cholesterol Metabolism/SHH |
| <i>NODAL</i>            | Cholesterol Metabolism/SHH |
| <i>NOTCH</i> genes      | WNT PCP signaling          |
| <i>NSDHL</i>            | SHH pathway                |
| <i>PI4KA</i>            | Cholesterol Metabolism/SHH |
| <i>PKC</i>              | Cholesterol Metabolism/SHH |
| <i>PMVK</i>             | Calcium Signaling          |
| <i>PRICKLE</i> genes    | Cholesterol Metabolism/SHH |
| <i>PTCH</i> genes       | WNT PCP signaling          |
| <i>RAC</i>              | Rho Kinase Signaling       |
| <i>RAP1</i>             | Rho Kinase Signaling       |
| <i>RHO</i> kinase genes | Rho Kinase Signaling       |
| <i>ROCK</i> genes       | Rho Kinase Signaling       |
| <i>RYR</i> genes        | Calcium Signaling          |
| <i>SFRP</i> genes       | WNT signaling              |
| <i>SHH</i>              | SHH pathway                |
| <i>SMO</i>              | Cholesterol Metabolism/SHH |
| <i>SOX10</i>            | TGF-beta, WNT              |
| <i>SQLE</i>             | Cholesterol Metabolism/SHH |
| <i>SUFU</i>             | SHH signaling              |
| <i>TAU</i> genes        | Rho Kinase Signaling       |
| <i>TGFBR2</i>           | SMAD Signaling             |
| <i>VANGL</i> genes      | WNT PCP signaling          |
| <i>WNT</i> genes        | WNT                        |

---
