# Supplementary material for: Risk and Resilience Variants in the Retinoic Acid Metabolic and Developmental Pathways Associated with Risk of FASD Outcomes
Source: Biomolecules. 2024 May 10;14(5):569. doi: 10.3390/biom14050569 (PMC11117505; doi:10.3390/biom14050569)
Supplement: Supplementary file 1 [file biomolecules-14-00569-s001.zip]

Archive with 11 entries (11 files):
- Figure S1.pdf
- Supplemental Specific References.pdf
- Supplemental Table S1 Retinoic Acid and Ethanol Metabolism Gene Candidate List.pdf
- Supplemental Table S2 Retinoic Acid-Dependent Signaling Network Candidate Genes.pdf
- Supplemental Table S3 Candidate Genes in the Causative Genes of Rare Neurodevelopmental Disorders and their Interactive Partners.pdf
- Supplemental Table S4 Candidate Genes in Neurotransmitter, Forebrain Development and Collagen Genes.pdf
- Supplemental Table S5 Variant Analysis Results of Retinoic Acid and Alcohol Metabolism Candidate - Revised.pdf
- Supplemental Table S6 Variant Analysis Results of Genes in Retinoic Acid-Regulated Pathways - Revised.pdf
- Supplemental Table S7 Variant Analysis Results of the Causative Genes of Rare Neurodevelopmental Disorders - revised.pdf
- Supplemental Table S8 Variant Analysis Results of Neurotransmitter, Forebrain Development and Collagen Genes - revised.pdf
- Supplemental Table S9 Variants in Genes Found by FASD Diagnosis.pdf
